# Supplementary material for: Carbon Nanotube-Graphene Hybrid Electrodes with Enhanced Thermo-Electrochemical Cell Properties
Source: PubMed Central journal article supplement (PMC6835304; doi:10.3390/nano9101450), 2019-10-12
Supplement: nanomaterials-09-01450-s001.pdf [file nanomaterials-09-01450-s001.pdf]

## Supplementary Material

# Carbon Nanotube-Graphene Hybrid Electrodes with Enhanced Thermo-Electrochemical Cell Properties

Yuqing Zhou, Weijin Qian \*, Weijun Huang, Boyang Liu, Hao Lin, and Changkun Dong \*

Institute of Micro-Nano Structures & Optoelectronics, Wenzhou University, Wenzhou 325035, China; z857744841@163.com (Y.Z.); 18857757816@163.com (W.H.); wonderain@outlook.com (B.L.); linhao.good@icloud.com (H.L.)

\* Correspondence: weijinqian@wzu.edu.cn (W.Q.); dck@wzu.edu.cn (C.D.); Tel.: +86-577-8668-9067 (C.D.)

**Table S1.** Comparison on TEC performances of different nanomaterials.

| Nanomaterial     | Current density (A.m <sup>-2</sup> ) | Maximum power density (W.m <sup>-2</sup> ) | $\eta_r$ | Synthesis method                       | Ref.       |
|------------------|--------------------------------------|--------------------------------------------|----------|----------------------------------------|------------|
| CNT              | 18.6                                 | 0.28                                       | 0.6      | EPD                                    | 1          |
| CNT              | 45.2                                 | 0.82                                       | 0.9      | EPD                                    | 2          |
| CNT buckypaper   | 67                                   | 1.45                                       | 1.4      | Vacuum filtration                      | 3          |
| CNT-ACT *        | 0.39                                 | 0.46*10 <sup>-3</sup>                      | /        | Dipping and drying                     | 4          |
| SWNT-GrO *       | /                                    | 1.85                                       | 2.63     | Microwave+ bath sonication             | 5          |
| CNT-Pt           | /                                    | 6.6                                        | 3.95     | Vacuum filtration +wet chemical method | 6          |
| CNT-Ag           | 53.6                                 | 0.967                                      | 0.96     | CVD+EPD                                | 7          |
| CNT-Graphene-0.1 | 62.8                                 | 1.15                                       | 1.35     | EPD                                    | This paper |

Note: SWNT-GrO \* is single-walled CNT-reduced graphene oxide; CNT-ACT \* is CNT coated activated carbon textile.

### References

1. Qian, W. J.; Li, M. J.; Chen, L. H.; Zhang, J. H. and Dong, C.K. Improving thermo-electrochemical cell performance by constructing Ag–MgO–CNTs nanocomposite electrodes. *RSC Adv.* **2015**, *5*, 97982-97987.
2. Qian, W. J.; Cao, M. X.; Xie, F.; Dong, C. K. Thermo-electrochemical cells based on **carbon nanotube** electrodes by electrophoretic deposition. *Nano-Micro Lett.* **2016**, *8*, 240-246.
3. Hu, R. C.; Cola, B. A.; Haram, N.; Barisci, J. N.; Lee, S.; Stoughton, S.; Wallace, G.; Too, C.; Thomas, M.; Gestos, A.; Cruz, M. E. D.; Ferraris, J. P.; Zakhidov A. A. and Baughman, R. H. Harvesting waste thermal energy using a carbon-nanotube-based thermo-electrochemical cell. *Nano Lett.* **2010**, *10*, 838-846.
4. Im, H.; Moon, H. G.; Lee, J. S.; Chung, I. Y.; Kang, T. J. and Kim, Y. H. Flexible thermocells for utilization of body heat. *Nano Res.* **2014**, *7*, 443-452.
5. Romano, M. S.; Li, N.; Antiohos, D.; Razal, J. M.; Nattestad, A.; Beirne, S.; Fang, S. L.; Chen, Y. S.; Jalili, R.; Wallace, G. G.; Baughman, R. and Chen, J. Carbon nanotube–reduced graphene oxide composites for thermal energy harvesting applications. *Adv. Mater.* **2013**, *25*, 6602-6606.

6. Im, H.; Kim, T.; Song, H.; Choi, J.; Park, J. S.; Ovalle-Robles, R.; Yang, H. D.; Kihm, K. D.; Baughman, R. H.; Lee, H. H.; Kang, T. J. and Kim, Y. H. High-efficiency electrochemical thermal energy harvester using carbon nanotube aerogel sheet electrodes. *Nat. Commun.* **2016**, *7*, 10600.
7. Zhao, F.; Qian, W. J.; Li, M. J.; Li, W.; Chen, L. H.; Zhong, F. Y.; Huang, W. J. and Dong, C. K. Directly grown carbon nanotube based hybrid electrodes with enhanced thermo-cell performances. *RSC Adv.* **2017**, *7*, 23890-23895.
